# Supplementary material for: Identification of the shortest species-specific oligonucleotide sequences
Source: HighWire-hosted journal article supplement (doi:10.1101/gr.280070.124), 2025-01-02
Supplement: Supplemental_Tables.xlsx [file Supplemental_Tables.xlsx]

## Sheet: README
Supplementary Table 1	Accessions of genomes used in the study.
Supplementary Table 2	UMLS Keywords and CUIs of interest used in disease2gene DisGeNET query.

## Sheet: Supplementary Table S1
Quasi-Prime genomes	Zoonomia case study genomes
Accession Number	Accession Number
GCA_000002515.1	GCA_000001405.27_GRCh38.p12
GCA_000002985.3	GCA_000164785.2_C_hoffmanni-2.0.1
GCA_000005845.2	GCA_000165445.3_Mmur_3.0
GCA_000006745.1	GCA_000181375.1_ASM18137v1
GCA_000006805.1	GCA_000247795.2_Bos_indicus_1.0
GCA_000006925.2	GCA_000264685.2_Panu_3.0
GCA_000007065.1	GCA_000465285.1_ASM46528v1
GCA_000007305.1	GCA_000465405.1_ASM46540v1
GCA_000007385.1	GCA_000688575.1_CavAp1.0
GCA_000007665.1	GCA_000738955.1_M_pentadactyla-1.1.1
GCA_000007745.1	GCA_000767525.1_Vi_pacos_V1.0
GCA_000007765.2	GCA_000952055.2_Anan_2.0
GCA_000007945.1	GCA_000978405.1_CapAeg_1.0
GCA_000007985.2	GCA_000978805.1_ASM97880v1
GCA_000008005.1	GCA_001262665.1_Eflavifronsk33QCA
GCA_000008085.1	GCA_001624865.1_SPRET_EiJ_v1
GCA_000008165.1	GCA_001651235.1_ASM165123v1
GCA_000008185.1	GCA_001660835.1_ASM166083v1
GCA_000008225.1	GCA_001685075.1_ASM168507v1
GCA_000008285.1	GCA_001685095.1_ETalpinus_0.1
GCA_000008505.1	GCA_001857705.1_PanPar1.0
GCA_000008545.1	GCA_001887905.1_LycPicSAfr1.0
GCA_000008605.1	GCA_001888835.1_ASM188883v1
GCA_000008645.1	GCA_001890085.1_ASM189008v1
GCA_000008665.1	GCA_002007445.1_ASM200744v1
GCA_000008725.1	GCA_002007465.1_ASM200746v1
GCA_000008765.1	GCA_002102435.1_Ovir.te_1.0
GCA_000009005.1	GCA_002201575.1_ASM220157v1
GCA_000009025.1	GCA_002201775.1_ALER1.0
GCA_000009045.1	GCA_002215935.1_ASM221593v1
GCA_000009065.1	GCA_002406435.1_ASM240643v1
GCA_000009085.1	GCA_002443075.1_Milu1.0
GCA_000009105.1	GCA_002754865.1_ASM275486v1
GCA_000009345.1	GCA_002776525.1_ASM277652v1
GCA_000009565.2	GCA_002844835.1_ASM284483v1
GCA_000009705.1	GCA_002880755.3_Clint_PTRv2
GCA_000009825.1	GCA_002880775.3_Susie_PABv2
GCA_000009845.1	GCA_002940915.2_ASM294091v2
GCA_000009865.1	GCA_003031525.1_Neophocaena_asiaeorientalis_V1
GCA_000009985.1	GCA_004023785.1_MunMun_v1_BIUU
GCA_000010065.1	GCA_004023805.1_PanOnc_v1_BIUU
GCA_000010085.1	GCA_004023825.1_VulLag_v1_BIUU
GCA_000010145.1	GCA_004023845.1_HelPar_v1_BIUU
GCA_000010205.1	GCA_004023865.1_MirAng_v1_BIUU
GCA_000010265.1	GCA_004023885.1_CryFer_v1_BIUU
GCA_000010525.1	GCA_004023905.1_SurSur_v1_BIUU
GCA_000010545.1	GCA_004023925.1_FelNig_v1_BIUU
GCA_000010765.1	GCA_004023945.1_HyaHya_v1_BIUU
GCA_000010805.1	GCA_004023965.1_SpiGra_v1_BIUU
GCA_000010865.1	GCA_004024565.1_ZalCal_v1_BIUU
GCA_000010965.1	GCA_004024585.1_ParHer_v1_BIUU
GCA_000011025.1	GCA_004024605.1_PteBra_v1_BIUU
GCA_000011145.1	GCA_004024625.1_MelCap_v1_BIUU
GCA_000011225.1	GCA_004024645.1_MizCoq_v1_BIUU
GCA_000011245.1	GCA_004024665.1_LemCat_v1_BIUU
GCA_000011265.1	GCA_004024685.1_DipSte_v1_BIUU
GCA_000011345.1	GCA_004024705.1_MosMos_v1_BIUU
GCA_000011385.1	GCA_004024725.1_CheMed_v1_BIUU
GCA_000011585.1	GCA_004024745.1_CatWag_v1_BIUU
GCA_000011605.1	GCA_004024765.1_ZapHud_v1_BIUU
GCA_000011645.1	GCA_004024785.1_AteGeo_v1_BIUU
GCA_000011965.2	GCA_004024805.1_XerIna_v1_BIUU
GCA_000011985.1	GCA_004024825.1_PygNem_v1_BIUU
GCA_000012145.1	GCA_004024845.1_TonSau_v1_BIUU
GCA_000012265.1	GCA_004024865.1_RouAeg_v1_BIUU
GCA_000012305.1	GCA_004024885.1_SagImp_v1_BIUU
GCA_000012325.1	GCA_004024905.1_TapInd_v1_BIUU
GCA_000012625.1	GCA_004024925.1_ScaAqu_v1_BIUU
GCA_000012665.1	GCA_004024945.1_UroGra_v1_BIUU
GCA_000012785.1	GCA_004024965.1_TraJav_v1_BIUU
GCA_000013025.1	GCA_004024985.1_SaiTat_v1_BIUU
GCA_000013065.1	GCA_004025005.1_TadBra_v1_BIUU
GCA_000013125.1	GCA_004025025.1_TapTer_v1_BIUU
GCA_000013225.1	GCA_004025045.1_SigHis_v1_BIUU
GCA_000013265.1	GCA_004025065.1_SemEnt_v1_BIUU
GCA_000013285.1	GCA_004025085.1_ThrSwi_v1_BIUU
GCA_000013325.1	GCA_004025105.1_TamTet_v1_BIUU
GCA_000013365.1	GCA_004025125.1_TolMat_v1_BIUU
GCA_000013445.1	GCA_004026225.1_RhiPru_v1_BIUU
GCA_000013505.1	GCA_004026525.1_MinSch_v1_BIUU
GCA_000013525.1	GCA_004026545.1_MorMeg_v1_BIUU
GCA_000013585.1	GCA_004026565.1_RanTarSib_v1_BIUU
GCA_000013605.1	GCA_004026585.1_NocLep_v1_BIUU
GCA_000013625.1	GCA_004026605.1_OndZib_v1_BIUU
GCA_000013665.1	GCA_004026625.1_PipPip_v1_BIUU
GCA_000013865.1	GCA_004026645.1_PitPit_v1_BIUU
GCA_000013885.1	GCA_004026665.1_MurFea_v1_BIUU
GCA_000013945.1	GCA_004026685.1_MonMon_M_v1_BIUU
GCA_000013965.1	GCA_004026705.1_MicTal_v1_BIUU
GCA_000013985.1	GCA_004026725.1_OnyTor_v1_BIUU
GCA_000014005.1	GCA_004026745.1_MyrTri_v1_BIUU
GCA_000014045.1	GCA_004026765.1_MicHir_v1_BIUU
GCA_000014225.1	GCA_004026785.1_MerUng_v1_BIUU
GCA_000014285.2	GCA_004026805.1_LasBor_v1_BIUU
GCA_000014505.1	GCA_004026825.1_HemHyl_v1_BIUU
GCA_000014625.1	GCA_004026845.1_HetBruBak_v1_BIUU
GCA_000014645.1	GCA_004026855.1_LepAme_v1_BIUU
GCA_000014745.1	GCA_004026885.1_MegLyr_v1_BIUU
GCA_000014785.1	GCA_004026905.1_HysCri_v1_BIUU
GCA_000015605.1	GCA_004026925.1_ProCapCap_v1_BIUU
GCA_000015625.1	GCA_004026945.1_OviCan_v1_BIUU
GCA_000015665.1	GCA_004026965.1_PetTyp_v1_BIUU
GCA_000015685.1	GCA_004026985.1_MyoMyo_v1_BIUU
GCA_000015745.1	GCA_004027005.1_MusAve_v1_BIUU
GCA_000015885.1	GCA_004027025.1_MyoCoy_v1_BIUU
GCA_000015965.1	GCA_004027065.1_HipAmp_v1_BIUU
GCA_000016045.1	GCA_004027085.1_MesBid_v1_BIUU
GCA_000016205.1	GCA_004027105.1_NasLar_v1_BIUU
GCA_000016265.1	GCA_004027145.1_DauMad_v1_BIUU
GCA_000016345.1	GCA_004027165.1_CteSoc_v1_BIUU
GCA_000016465.1	GCA_004027185.1_GliGli_v1_BIUU
GCA_000016485.1	GCA_004027205.1_CteGun_v1_BIUU
GCA_000016505.1	GCA_004027255.1_GalVar_v1_BIUU
GCA_000016625.1	GCA_004027275.1_EulFul_v1_BIUU
GCA_000016645.1	GCA_004027295.1_DolPat_v1_BIUU
GCA_000016985.1	GCA_004027315.1_DicBicMic_v1_BIUU
GCA_000017025.1	GCA_004027335.1_EryPat_v1_BIUU
GCA_000017105.1	GCA_004027355.1_EleEdw_v1_BIUU
GCA_000017205.1	GCA_004027375.1_MacSob_v1_BIUU
GCA_000017245.1	GCA_004027415.1_HipGal_v1_BIUU
GCA_000017265.1	GCA_004027435.1_ArtJam_v1_BIUU
GCA_000017405.1	GCA_004027455.1_HydHyd_v1_BIUU
GCA_000017505.1	GCA_004027475.1_AnoCau_v1_BIUU
GCA_000017525.1	GCA_004027495.1_BeaHun_v1_BIUU
GCA_000017565.1	GCA_004027515.1_AntAmePen_v1_BIUU
GCA_000017645.1	GCA_004027535.1_AcoCah_v1_BIUU
GCA_000017765.1	GCA_004027555.1_CraTho_v1_BIUU
GCA_000017865.1	GCA_004027575.1_CriGam_v1_BIUU
GCA_000018025.1	GCA_004027595.1_DinBra_v1_BIUU
GCA_000018305.1	GCA_004027615.1_CertNeg_v1_BIUU
GCA_000018325.1	GCA_004027635.1_CroInd_v1_BIUU
GCA_000018345.1	GCA_004027655.1_GraMur_v1_BIUU
GCA_000018385.1	GCA_004027675.1_CasCan_v1_BIUU
GCA_000018465.1	GCA_004027695.1_CavTsc_v1_BIUU
GCA_000018505.1	GCA_004027715.1_CalDon_v1_BIUU
GCA_000018545.1	GCA_004027735.1_CarPer_v1_BIUU
GCA_000018725.1	GCA_004027755.1_CebAlb_v1_BIUU
GCA_000018925.1	GCA_004027775.1_BraVar_v1_BIUU
GCA_000018965.1	GCA_004027795.1_CerCot_v1_BIUU
GCA_000019085.1	GCA_004027815.1_NycCou_v1_BIUU
GCA_000019205.1	GCA_004027835.1_AloPal_v1_BIUU
GCA_000019325.1	GCA_004027855.1_ChoDid_v1_BIUU
GCA_000019425.1	GCA_004027875.1_AplRuf_v1_BIUU
GCA_000019685.1	GCA_004027895.1_AllBul_v1_BIUU
GCA_000019705.1	GCA_004027915.1_CapPil_v1_BIUU
GCA_000019725.1	GCA_004027935.1_ChrAsi_v1_BIUU
GCA_000019905.1	GCA_004027955.1_ChaVel_v1_BIUU
GCA_000019965.1	GCA_004363415.1_EscRob_v1_BIUU
GCA_000020125.1	GCA_004363435.1_PlaMin_v1_BIUU
GCA_000020245.1	GCA_004363455.1_EubJap_v1_BIUU
GCA_000020285.1	GCA_004363475.1_PerLonPac_v1_BIUU
GCA_000020625.1	GCA_004363495.1_PhoPho_v1_BIUU
GCA_000020745.1	GCA_004363515.1_IniGeo_v1_BIUU
GCA_000020805.1	GCA_004363535.1_DasPun_v1_BIUU
GCA_000021065.1	GCA_004363575.1_SolPar_v1_BIUU
GCA_000021165.1	GCA_004363605.1_IndInd_v1_BIUU
GCA_000021365.1	GCA_004363705.1_KogBre_v1_BIUU
GCA_000021465.1	GCA_004363935.1_PonBla_v1_BIUU
GCA_000021685.1	GCA_004364475.1_ZipCav_v1_BIUU
GCA_000021765.1	GCA_004365145.1_OryAfe_v1_BIUU
GCA_000021785.1	GCA_004365215.1_CunPac_v1_BIUU
GCA_000021825.1	GCA_004365275.1_TupTan_v1_BIUU
GCA_000021865.1	GCA_004765945.1_ManTri_v1_BIUU
GCA_000021885.1	GCA_007922735.1_RhiFer_v1_BIUU
GCA_000021905.1	GCA_007922755.1_PedCap_v1_BIUU
GCA_000021925.1	GCA_007922775.1_AntPal_v1_BIUU
GCA_000022225.1	GCA_007922795.1_NycHum_v1_BIUU
GCA_000022285.1	GCA_007922815.1_MacCal_v1_BIUU
GCA_000022305.1	GCA_900006655.3_Susie3
GCA_000022445.1	GCA_900094665.2_CAROLI_EIJ_v1.1
GCA_000022485.1	GCA_900095145.2_PAHARI_EIJ_v1.1
GCA_000022505.1	GCA_900186095.1_CHOK1S_HZDv1
GCA_000022565.1	GCF_000001635.26_GRCm38.p6
GCA_000022605.2	GCF_000001895.5_Rnor_6.0
GCA_000022645.2	GCF_000001905.1_Loxafr3.0
GCA_000022765.1	GCF_000002285.3_CanFam3.1
GCA_000022805.1	GCF_000002305.2_EquCab2.0
GCA_000022905.1	GCF_000003025.5_Sscrofa10.2
GCA_000022925.1	GCF_000003205.7_Btau_5.0.1
GCA_000022985.1	GCF_000003625.3_OryCun2.0
GCA_000023185.1	GCF_000146795.2_Nleu_3.0
GCA_000023225.1	GCF_000147115.1_Myoluc2.0
GCA_000023445.1	GCF_000151735.1_Cavpor3.0
GCA_000023665.1	GCF_000151845.1_Pvam_2.0
GCA_000023705.1	GCF_000151885.1_Dord_2.0
GCA_000023785.1	GCF_000181275.1_SorAra2.0
GCA_000023805.1	GCF_000181295.1_OtoGar3
GCA_000023865.1	GCF_000181335.2_Felis_catus_8.0
GCA_000024025.1	GCF_000208655.1_Dasnov3.0
GCA_000024125.1	GCF_000235385.1_SaiBol1.0
GCA_000024345.1	GCF_000236235.1_SpeTri2.0
GCA_000024465.1	GCF_000239315.1_MusPutFurMale1.0
GCA_000024645.1	GCF_000243295.1_TriManLat1.0
GCA_000024725.1	GCF_000247695.1_HetGla_female_1.0
GCA_000024825.1	GCF_000258655.2_panpan1.1
GCA_000024865.1	GCF_000260255.1_OctDeg1.0
GCA_000024925.1	GCF_000260355.1_ConCri1.0
GCA_000024965.1	GCF_000276665.1_ChiLan1.0
GCA_000025025.1	GCF_000280705.1_JacJac1.0
GCA_000025085.1	GCF_000283155.1_CerSimSim1.0
GCA_000025125.1	GCF_000292845.1_OchPri3.0
GCA_000025145.2	GCF_000296755.1_EriEur2.0
GCA_000025165.1	GCF_000298355.1_BosGru_v2.0
GCA_000025245.2	GCF_000298735.2_Oar_v4.0
GCA_000025265.1	GCF_000308155.1_EptFus1.0
GCA_000025305.1	GCF_000311805.1_CB1
GCA_000025405.2	GCF_000313985.1_EchTel2.0
GCA_000025525.1	GCF_000317375.1_MicOch1.0
GCA_000025705.1	GCF_000321225.1_Oros_1.0
GCA_000025825.1	GCF_000325575.1_ASM32557v1
GCA_000025885.1	GCF_000327345.1_ASM32734v1
GCA_000025905.1	GCF_000331955.2_Oorc_1.1
GCA_000025925.1	GCF_000349665.1_MesAur1.0
GCA_000025985.1	GCF_000349705.1_LepWed1.0
GCA_000026005.1	GCF_000364345.1_Macaca_fascicularis_5.0
GCA_000026045.1	GCF_000400835.1_PHO1.0
GCA_000026085.1	GCF_000412655.1_ASM41265v1
GCA_000026125.1	GCF_000442215.1_Lipotes_vexillifer_v1
GCA_000026145.1	GCF_000464555.1_PanTig1.0
GCA_000026225.1	GCF_000471725.1_UMD_CASPUR_WB_2.0
GCA_000026245.1	GCF_000500345.1_Pman_1.0
GCA_000026285.2	GCF_000622305.1_S.galili_v1.0
GCA_000026665.1	GCF_000687225.1_UrsMar_1.0
GCA_000026685.1	GCF_000696695.1_Burgud
GCA_000026945.1	GCF_000743615.1_DMR_v1.0
GCA_000026965.1	GCF_000754665.1_Bison_UMD1.0
GCA_000027125.1	GCF_000767585.1_PRJNA234474_Ca_dromedarius_V1.0
GCA_000027165.1	GCF_000767855.1_Ca_bactrianus_MBC_1.0
GCA_000027305.1	GCF_000769185.1_Rrox_v1
GCA_000027345.1	GCF_000772875.2_Mmul_8.0.1
GCA_000043285.1	GCF_000951035.1_Cang.pa_1.0
GCA_000046685.1	GCF_000951045.1_Mleu.le_1.0
GCA_000046705.1	GCF_000955945.1_Caty_1.0
GCA_000048645.1	GCF_000956065.1_Mnem_1.0
GCA_000060285.1	GCF_000956105.1_Pcoq_1.0
GCA_000064305.2	GCF_001305755.1_ASM130575v1
GCA_000067205.1	GCF_001443585.1_aciJub1
GCA_000069025.1	GCF_001458135.1_marMar2.1
GCA_000069245.1	GCF_001595765.1_Mnat.v1
GCA_000069965.1	GCF_001604975.1_Cebus_imitator-1.0
GCA_000085225.1	GCF_001685135.1_ManJav1.0
GCA_000087965.1	GCF_001698545.1_ASM169854v1
GCA_000090965.1	GCF_001704415.1_ARS1
GCA_000091025.4	GCF_002288905.1_ASM228890v2
GCA_000091345.1	GCF_002288925.1_ASM228892v2
GCA_000091405.1	GCF_003327715.1_PumCon1.0
GCA_000092285.1
GCA_000092345.1
GCA_000092565.1
GCA_000092665.1
GCA_000092785.1
GCA_000092905.1
GCA_000092965.1
GCA_000143535.4
GCA_000143605.1
GCA_000143845.1
GCA_000144605.1
GCA_000144645.1
GCA_000145235.1
GCA_000145705.1
GCA_000146025.1
GCA_000146165.2
GCA_000146185.1
GCA_000146265.4
GCA_000146505.1
GCA_000147015.1
GCA_000147695.3
GCA_000147775.3
GCA_000147815.3
GCA_000147835.3
GCA_000148385.1
GCA_000148705.1
GCA_000148815.2
GCA_000148855.1
GCA_000148875.1
GCA_000148935.1
GCA_000151105.2
GCA_000151205.2
GCA_000152065.3
GCA_000152925.3
GCA_000152945.2
GCA_000153165.2
GCA_000153405.2
GCA_000153485.2
GCA_000154585.2
GCA_000154745.2
GCA_000156995.2
GCA_000157355.2
GCA_000159155.2
GCA_000160335.2
GCA_000161795.2
GCA_000165485.1
GCA_000165775.3
GCA_000165815.1
GCA_000166315.1
GCA_000168355.3
GCA_000168875.3
GCA_000172575.2
GCA_000172715.2
GCA_000172995.2
GCA_000175255.2
GCA_000175575.2
GCA_000177615.2
GCA_000178495.2
GCA_000178875.2
GCA_000178955.2
GCA_000179015.2
GCA_000179035.2
GCA_000179635.2
GCA_000182745.1
GCA_000183225.1
GCA_000183345.1
GCA_000184185.1
GCA_000184345.2
GCA_000184925.1
GCA_000185805.1
GCA_000185885.1
GCA_000186225.1
GCA_000186405.1
GCA_000186725.1
GCA_000186985.3
GCA_000187205.4
GCA_000188955.5
GCA_000189435.3
GCA_000189495.1
GCA_000189535.1
GCA_000189735.2
GCA_000190575.1
GCA_000191165.1
GCA_000191425.1
GCA_000191465.1
GCA_000191505.1
GCA_000191565.1
GCA_000191925.1
GCA_000192335.1
GCA_000192395.2
GCA_000192705.1
GCA_000192725.1
GCA_000193205.1
GCA_000193395.1
GCA_000193595.3
GCA_000193615.3
GCA_000194785.1
GCA_000195065.1
GCA_000195295.1
GCA_000195335.1
GCA_000195535.1
GCA_000195675.1
GCA_000195795.1
GCA_000195815.1
GCA_000196015.1
GCA_000196055.1
GCA_000196135.1
GCA_000196275.1
GCA_000196335.1
GCA_000196455.1
GCA_000196555.1
GCA_000196695.1
GCA_000196735.1
GCA_000197875.1
GCA_000198515.1
GCA_000200595.1
GCA_000202635.1
GCA_000202835.1
GCA_000203855.3
GCA_000204135.1
GCA_000204565.1
GCA_000210515.1
GCA_000210995.1
GCA_000211075.1
GCA_000211255.2
GCA_000211855.3
GCA_000212335.1
GCA_000212355.1
GCA_000213235.1
GCA_000213635.1
GCA_000213825.1
GCA_000214175.1
GCA_000214355.1
GCA_000214785.1
GCA_000214805.1
GCA_000215325.1
GCA_000215645.1
GCA_000215665.1
GCA_000215975.1
GCA_000217635.1
GCA_000217675.1
GCA_000218585.1
GCA_000219195.1
GCA_000219375.1
GCA_000219475.3
GCA_000219725.1
GCA_000219785.1
GCA_000220885.1
GCA_000222485.1
GCA_000223195.1
GCA_000224105.1
GCA_000224435.1
GCA_000224475.1
GCA_000224985.1
GCA_000225345.1
GCA_000225915.1
GCA_000225955.1
GCA_000226315.1
GCA_000227625.1
GCA_000230655.3
GCA_000230895.3
GCA_000231925.1
GCA_000233435.1
GCA_000233575.1
GCA_000233715.3
GCA_000233775.1
GCA_000233875.1
GCA_000235405.3
GCA_000235605.1
GCA_000235765.3
GCA_000236455.2
GCA_000236585.1
GCA_000236925.1
GCA_000237145.1
GCA_000237265.1
GCA_000237975.1
GCA_000237995.2
GCA_000238255.4
GCA_000238455.3
GCA_000238975.1
GCA_000239235.1
GCA_000239975.1
GCA_000241125.1
GCA_000242595.3
GCA_000242635.3
GCA_000242935.3
GCA_000243115.3
GCA_000243135.3
GCA_000250635.1
GCA_000250675.3
GCA_000250905.1
GCA_000250945.1
GCA_000251085.2
GCA_000252445.1
GCA_000253135.1
GCA_000253155.1
GCA_000253175.1
GCA_000253195.1
GCA_000253215.1
GCA_000255115.3
GCA_000255275.1
GCA_000255915.1
GCA_000255935.1
GCA_000258245.1
GCA_000258365.1
GCA_000258535.2
GCA_000258885.1
GCA_000259365.1
GCA_000259545.1
GCA_000260965.1
GCA_000260985.3
GCA_000262145.1
GCA_000263195.1
GCA_000263215.1
GCA_000264665.2
GCA_000265385.1
GCA_000265405.1
GCA_000265505.1
GCA_000269925.1
GCA_000269985.1
GCA_000270065.1
GCA_000270125.2
GCA_000271325.1
GCA_000271665.2
GCA_000271885.2
GCA_000272835.4
GCA_000276705.2
GCA_000276825.1
GCA_000277205.1
GCA_000277775.2
GCA_000281175.1
GCA_000281235.1
GCA_000281435.2
GCA_000281695.1
GCA_000283695.1
GCA_000283795.1
GCA_000283875.1
GCA_000284035.1
GCA_000284075.1
GCA_000284095.1
GCA_000284115.1
GCA_000284255.1
GCA_000284275.1
GCA_000284375.1
GCA_000284435.1
GCA_000284515.1
GCA_000285655.3
GCA_000287355.1
GCA_000292445.1
GCA_000292705.1
GCA_000293885.3
GCA_000294365.1
GCA_000294515.1
GCA_000294635.1
GCA_000296215.2
GCA_000297075.2
GCA_000298555.2
GCA_000299095.1
GCA_000300235.2
GCA_000300435.2
GCA_000300475.1
GCA_000304455.1
GCA_000304495.1
GCA_000305785.2
GCA_000306745.1
GCA_000306885.1
GCA_000307025.1
GCA_000307185.1
GCA_000307535.1
GCA_000307585.2
GCA_000307975.2
GCA_000309565.2
GCA_000315955.1
GCA_000316175.1
GCA_000316575.1
GCA_000316605.1
GCA_000317065.1
GCA_000317305.3
GCA_000317475.1
GCA_000317515.1
GCA_000317635.1
GCA_000317695.1
GCA_000317835.1
GCA_000317895.1
GCA_000318035.1
GCA_000318525.2
GCA_000318765.1
GCA_000318865.1
GCA_000319245.1
GCA_000321395.1
GCA_000325705.1
GCA_000328685.1
GCA_000330845.1
GCA_000330885.1
GCA_000331165.2
GCA_000331695.1
GCA_000331715.1
GCA_000332755.1
GCA_000334875.3
GCA_000336445.1
GCA_000338095.1
GCA_000338695.1
GCA_000338715.2
GCA_000338755.1
GCA_000339015.1
GCA_000340315.1
GCA_000340785.1
GCA_000340795.1
GCA_000340865.1
GCA_000340885.1
GCA_000340925.1
GCA_000341395.1
GCA_000341425.1
GCA_000341655.1
GCA_000341695.1
GCA_000341855.1
GCA_000344335.2
GCA_000344785.1
GCA_000346065.1
GCA_000346595.1
GCA_000347675.2
GCA_000348565.1
GCA_000348725.1
GCA_000349225.1
GCA_000349745.1
GCA_000349845.1
GCA_000349885.2
GCA_000350205.1
GCA_000364165.2
GCA_000367725.3
GCA_000376545.2
GCA_000376705.1
GCA_000385525.1
GCA_000387745.2
GCA_000389905.1
GCA_000389925.1
GCA_000389945.1
GCA_000389965.1
GCA_000390265.1
GCA_000392485.2
GCA_000397185.1
GCA_000400955.1
GCA_000404145.1
GCA_000404165.1
GCA_000404245.1
GCA_000408885.1
GCA_000412265.2
GCA_000412675.1
GCA_000412775.1
GCA_000414215.1
GCA_000416365.2
GCA_000417265.2
GCA_000418345.1
GCA_000418495.1
GCA_000419385.1
GCA_000422085.1
GCA_000427215.1
GCA_000430105.1
GCA_000430165.1
GCA_000430425.1
GCA_000439255.1
GCA_000439275.1
GCA_000439395.1
GCA_000439435.1
GCA_000439455.1
GCA_000439535.1
GCA_000441635.1
GCA_000441815.1
GCA_000442415.1
GCA_000442645.1
GCA_000444405.1
GCA_000444465.1
GCA_000445995.2
GCA_000452385.2
GCA_000452745.3
GCA_000463055.1
GCA_000463345.3
GCA_000463385.1
GCA_000465255.1
GCA_000466105.2
GCA_000468615.2
GCA_000473275.1
GCA_000473305.1
GCA_000477415.1
GCA_000477435.1
GCA_000479375.3
GCA_000484505.2
GCA_000484535.1
GCA_000486525.2
GCA_000486585.2
GCA_000486765.2
GCA_000486915.2
GCA_000487575.2
GCA_000487935.2
GCA_000493295.2
GCA_000493535.2
GCA_000493675.1
GCA_000493775.1
GCA_000494775.2
GCA_000496265.1
GCA_000496635.1
GCA_000498315.1
GCA_000498675.1
GCA_000499365.1
GCA_000499645.1
GCA_000499805.2
GCA_000500935.1
GCA_000504585.2
GCA_000507205.2
GCA_000507225.1
GCA_000508225.1
GCA_000508765.1
GCA_000510265.1
GCA_000512355.1
GCA_000512375.1
GCA_000512955.1
GCA_000513595.1
GCA_000513655.1
GCA_000513695.1
GCA_000517445.1
GCA_000520015.2
GCA_000521505.1
GCA_000521565.1
GCA_000521605.1
GCA_000521645.1
GCA_000521695.1
GCA_000521725.1
GCA_000521765.1
GCA_000524575.1
GCA_000525675.1
GCA_000534935.2
GCA_000550805.1
GCA_000565175.1
GCA_000567945.1
GCA_000568455.1
GCA_000568855.2
GCA_000576555.1
GCA_000582555.1
GCA_000585495.1
GCA_000585995.1
GCA_000590475.1
GCA_000590925.1
GCA_000597845.1
GCA_000597945.2
GCA_000599625.1
GCA_000599685.1
GCA_000599705.1
GCA_000599965.1
GCA_000612485.1
GCA_000612505.1
GCA_000613145.2
GCA_000619905.2
GCA_000623095.2
GCA_000626315.1
GCA_000626375.1
GCA_000626595.1
GCA_000632475.2
GCA_000632815.1
GCA_000632865.1
GCA_000632885.1
GCA_000632945.1
GCA_000635955.1
GCA_000648515.1
GCA_000648525.1
GCA_000661915.1
GCA_000662395.1
GCA_000687475.2
GCA_000691545.1
GCA_000691565.1
GCA_000695095.2
GCA_000695935.1
GCA_000698475.1
GCA_000698885.1
GCA_000699025.1
GCA_000705595.2
GCA_000706705.1
GCA_000709435.1
GCA_000709455.1
GCA_000710375.3
GCA_000714675.1
GCA_000715155.2
GCA_000722765.2
GCA_000723165.1
GCA_000723505.1
GCA_000724505.1
GCA_000725325.1
GCA_000725365.1
GCA_000730165.2
GCA_000730215.2
GCA_000730285.1
GCA_000730345.1
GCA_000730365.1
GCA_000730425.1
GCA_000731315.1
GCA_000732045.2
GCA_000734975.2
GCA_000737325.2
GCA_000737535.1
GCA_000737555.1
GCA_000737885.1
GCA_000738065.1
GCA_000738475.1
GCA_000739375.1
GCA_000739435.1
GCA_000739475.1
GCA_000740155.1
GCA_000740275.1
GCA_000740355.1
GCA_000740415.1
GCA_000741005.1
GCA_000743945.1
GCA_000746645.1
GCA_000747345.1
GCA_000747375.1
GCA_000750195.1
GCA_000750225.1
GCA_000750275.1
GCA_000754265.1
GCA_000754275.1
GCA_000754345.1
GCA_000754365.1
GCA_000755145.1
GCA_000755585.2
GCA_000755705.1
GCA_000755725.1
GCA_000755765.1
GCA_000755805.1
GCA_000755945.1
GCA_000756485.1
GCA_000756505.1
GCA_000759555.1
GCA_000761155.1
GCA_000761195.1
GCA_000763475.1
GCA_000763515.1
GCA_000763535.2
GCA_000764535.1
GCA_000765415.1
GCA_000766885.2
GCA_000767405.1
GCA_000769405.2
GCA_000772065.1
GCA_000772085.1
GCA_000772225.1
GCA_000772715.2
GCA_000772775.3
GCA_000774075.2
GCA_000775975.1
GCA_000775995.1
GCA_000782855.1
GCA_000783875.2
GCA_000784945.1
GCA_000784965.1
GCA_000784985.1
GCA_000785515.1
GCA_000788715.2
GCA_000789255.1
GCA_000789315.1
GCA_000798935.2
GCA_000800725.2
GCA_000800765.1
GCA_000800825.1
GCA_000801275.1
GCA_000807275.1
GCA_000807315.1
GCA_000807375.1
GCA_000807405.4
GCA_000807415.4
GCA_000812165.1
GCA_000812665.2
GCA_000813165.1
GCA_000814205.1
GCA_000814825.1
GCA_000815065.1
GCA_000815105.2
GCA_000815245.1
GCA_000815275.2
GCA_000816045.1
GCA_000816105.1
GCA_000816205.1
GCA_000816345.1
GCA_000816385.2
GCA_000816785.1
GCA_000816845.1
GCA_000816945.1
GCA_000816985.1
GCA_000817935.1
GCA_000817975.1
GCA_000818095.1
GCA_000819445.1
GCA_000819565.1
GCA_000819615.1
GCA_000821185.2
GCA_000826835.2
GCA_000827855.1
GCA_000828035.1
GCA_000828515.1
GCA_000828535.1
GCA_000828555.1
GCA_000828595.1
GCA_000828775.1
GCA_000828815.1
GCA_000828835.1
GCA_000828855.1
GCA_000828875.1
GCA_000828955.1
GCA_000828975.1
GCA_000829035.1
GCA_000829115.1
GCA_000829135.1
GCA_000829195.1
GCA_000829335.1
GCA_000829395.1
GCA_000829965.1
GCA_000829985.1
GCA_000830315.1
GCA_000830885.1
GCA_000830905.1
GCA_000830985.1
GCA_000831145.1
GCA_000831185.1
GCA_000831405.1
GCA_000832305.1
GCA_000832525.1
GCA_000832565.1
GCA_000832635.1
GCA_000832765.1
GCA_000832805.1
GCA_000833025.1
GCA_000833235.1
GCA_000833295.1
GCA_000833315.1
GCA_000833355.1
GCA_000833375.1
GCA_000834235.1
GCA_000834495.1
GCA_000834825.1
GCA_000834845.1
GCA_000834865.1
GCA_000834885.1
GCA_000834945.1
GCA_000835085.1
GCA_000835185.1
GCA_000835205.1
GCA_000835225.1
GCA_000835265.1
GCA_000835285.1
GCA_000835305.1
GCA_000835365.1
GCA_000836805.1
GCA_000836865.1
GCA_000836925.1
GCA_000836985.1
GCA_000837065.1
GCA_000837125.1
GCA_000837145.1
GCA_000837205.1
GCA_000837265.1
GCA_000837285.2
GCA_000837325.1
GCA_000837345.1
GCA_000837385.1
GCA_000837405.1
GCA_000837425.1
GCA_000837485.1
GCA_000837545.1
GCA_000837585.1
GCA_000837625.1
GCA_000837685.1
GCA_000837725.1
GCA_000837765.1
GCA_000837785.1
GCA_000837805.1
GCA_000837885.1
GCA_000837925.1
GCA_000837985.1
GCA_000838045.1
GCA_000838065.1
GCA_000838085.1
GCA_000838185.1
GCA_000838285.1
GCA_000838345.1
GCA_000838445.1
GCA_000838505.1
GCA_000838545.1
GCA_000838585.1
GCA_000838645.1
GCA_000838665.1
GCA_000838685.1
GCA_000838705.1
GCA_000838865.1
GCA_000838885.1
GCA_000838925.1
GCA_000838945.1
GCA_000838985.1
GCA_000839025.1
GCA_000839085.1
GCA_000839125.1
GCA_000839145.1
GCA_000839165.1
GCA_000839265.1
GCA_000839305.1
GCA_000839325.1
GCA_000839445.1
GCA_000839505.1
GCA_000839525.1
GCA_000839565.1
GCA_000839645.1
GCA_000839705.1
GCA_000839725.1
GCA_000839765.1
GCA_000839825.1
GCA_000839845.1
GCA_000839885.1
GCA_000839945.1
GCA_000840005.1
GCA_000840025.1
GCA_000840045.1
GCA_000840065.1
GCA_000840085.1
GCA_000840105.1
GCA_000840125.1
GCA_000840185.1
GCA_000840245.1
GCA_000840265.1
GCA_000840305.1
GCA_000840385.1
GCA_000840405.1
GCA_000840425.1
GCA_000840505.1
GCA_000840585.1
GCA_000840645.2
GCA_000840685.1
GCA_000840765.1
GCA_000840905.1
GCA_000840925.1
GCA_000840965.1
GCA_000841045.1
GCA_000841065.1
GCA_000841085.1
GCA_000841205.1
GCA_000841245.1
GCA_000841345.1
GCA_000841405.1
GCA_000841445.1
GCA_000841565.1
GCA_000841665.1
GCA_000841705.1
GCA_000841725.1
GCA_000841785.1
GCA_000841805.1
GCA_000841845.1
GCA_000841865.2
GCA_000841985.1
GCA_000842005.1
GCA_000842025.1
GCA_000842065.1
GCA_000842085.1
GCA_000842145.1
GCA_000842245.1
GCA_000842305.1
GCA_000842325.1
GCA_000842345.1
GCA_000842385.1
GCA_000842405.1
GCA_000842525.1
GCA_000842585.1
GCA_000842625.1
GCA_000842665.1
GCA_000842785.1
GCA_000842845.1
GCA_000842865.1
GCA_000842925.1
GCA_000842985.1
GCA_000843025.1
GCA_000843105.1
GCA_000843125.1
GCA_000843145.1
GCA_000843165.1
GCA_000843305.1
GCA_000843345.1
GCA_000843385.1
GCA_000843445.1
GCA_000843485.1
GCA_000843505.1
GCA_000843565.1
GCA_000843665.1
GCA_000843845.1
GCA_000843885.1
GCA_000843965.1
GCA_000844045.1
GCA_000844065.1
GCA_000844105.1
GCA_000844185.1
GCA_000844225.1
GCA_000844245.1
GCA_000844285.1
GCA_000844305.1
GCA_000844345.1
GCA_000844385.1
GCA_000844465.1
GCA_000844525.1
GCA_000844545.1
GCA_000844565.1
GCA_000844605.1
GCA_000844625.1
GCA_000844645.1
GCA_000844705.1
GCA_000844745.1
GCA_000844785.1
GCA_000844805.1
GCA_000844825.1
GCA_000844865.1
GCA_000844885.1
GCA_000844985.1
GCA_000845005.1
GCA_000845025.2
GCA_000845045.1
GCA_000845085.1
GCA_000845145.1
GCA_000845185.1
GCA_000845265.1
GCA_000845285.1
GCA_000845345.1
GCA_000845405.1
GCA_000845485.1
GCA_000845505.1
GCA_000845545.1
GCA_000845585.1
GCA_000845805.1
GCA_000845885.1
GCA_000846025.1
GCA_000846065.1
GCA_000846085.1
GCA_000846165.1
GCA_000846325.1
GCA_000846425.1
GCA_000846445.1
GCA_000846465.1
GCA_000846485.1
GCA_000846505.1
GCA_000846545.1
GCA_000846645.1
GCA_000846685.1
GCA_000846845.1
GCA_000846865.1
GCA_000846885.1
GCA_000846905.1
GCA_000846925.1
GCA_000846945.1
GCA_000846985.1
GCA_000847005.2
GCA_000847145.1
GCA_000847185.1
GCA_000847225.1
GCA_000847245.1
GCA_000847285.1
GCA_000847365.1
GCA_000847385.1
GCA_000847425.1
GCA_000847445.1
GCA_000847465.1
GCA_000847665.1
GCA_000847685.1
GCA_000847705.1
GCA_000847725.1
GCA_000847745.1
GCA_000847765.1
GCA_000847785.1
GCA_000847805.1
GCA_000847845.1
GCA_000847865.1
GCA_000847925.1
GCA_000848045.2
GCA_000848065.1
GCA_000848085.2
GCA_000848205.1
GCA_000848225.1
GCA_000848265.1
GCA_000848285.1
GCA_000848305.1
GCA_000848345.1
GCA_000848365.1
GCA_000848385.1
GCA_000848425.1
GCA_000848445.1
GCA_000848605.1
GCA_000848645.1
GCA_000848665.1
GCA_000848725.1
GCA_000848785.1
GCA_000848805.1
GCA_000848865.1
GCA_000848885.1
GCA_000848985.1
GCA_000849005.1
GCA_000849085.1
GCA_000849205.1
GCA_000849225.1
GCA_000849265.1
GCA_000849285.1
GCA_000849365.1
GCA_000849385.1
GCA_000849425.1
GCA_000849465.1
GCA_000849485.1
GCA_000849505.1
GCA_000849565.1
GCA_000849665.1
GCA_000849825.2
GCA_000849845.1
GCA_000849885.1
GCA_000849965.1
GCA_000850005.1
GCA_000850125.1
GCA_000850265.1
GCA_000850285.1
GCA_000850405.1
GCA_000850465.1
GCA_000850585.1
GCA_000850665.1
GCA_000850685.1
GCA_000850725.1
GCA_000850745.1
GCA_000850765.1
GCA_000850805.1
GCA_000850905.1
GCA_000850965.1
GCA_000851005.1
GCA_000851085.1
GCA_000851145.1
GCA_000851205.1
GCA_000851225.1
GCA_000851265.1
GCA_000851285.1
GCA_000851305.3
GCA_000851345.1
GCA_000851425.1
GCA_000851565.1
GCA_000851585.1
GCA_000851605.1
GCA_000851725.1
GCA_000851905.2
GCA_000851925.1
GCA_000852045.1
GCA_000852165.1
GCA_000852185.1
GCA_000852205.1
GCA_000852285.1
GCA_000852305.1
GCA_000852325.1
GCA_000852365.1
GCA_000852425.1
GCA_000852445.1
GCA_000852505.1
GCA_000852745.1
GCA_000852785.1
GCA_000852845.1
GCA_000852865.1
GCA_000852985.1
GCA_000853065.1
GCA_000853085.1
GCA_000853105.1
GCA_000853125.1
GCA_000853145.1
GCA_000853245.1
GCA_000853425.1
GCA_000853485.1
GCA_000853525.3
GCA_000853545.1
GCA_000853625.1
GCA_000853745.1
GCA_000853785.1
GCA_000853825.1
GCA_000853845.1
GCA_000853865.1
GCA_000853905.1
GCA_000853945.1
GCA_000853985.1
GCA_000854125.1
GCA_000854205.1
GCA_000854245.1
GCA_000854385.1
GCA_000854405.1
GCA_000854465.1
GCA_000854505.1
GCA_000854525.1
GCA_000854545.1
GCA_000854685.1
GCA_000854725.1
GCA_000854845.1
GCA_000854885.1
GCA_000854905.1
GCA_000854945.1
GCA_000854965.1
GCA_000855065.1
GCA_000855105.1
GCA_000855125.1
GCA_000855145.1
GCA_000855185.1
GCA_000855205.1
GCA_000855265.1
GCA_000855385.1
GCA_000855405.1
GCA_000855485.1
GCA_000855505.1
GCA_000855565.1
GCA_000855645.1
GCA_000855745.1
GCA_000855785.1
GCA_000855805.1
GCA_000855825.1
GCA_000855845.1
GCA_000855865.1
GCA_000855985.1
GCA_000856085.1
GCA_000856125.1
GCA_000856165.1
GCA_000856185.1
GCA_000856225.1
GCA_000856285.1
GCA_000856325.1
GCA_000856345.1
GCA_000856365.1
GCA_000856505.1
GCA_000856585.1
GCA_000856605.1
GCA_000856625.1
GCA_000856645.1
GCA_000856725.1
GCA_000856925.1
GCA_000856965.1
GCA_000857025.1
GCA_000857045.1
GCA_000857125.1
GCA_000857185.1
GCA_000857205.1
GCA_000857245.1
GCA_000857325.2
GCA_000857345.1
GCA_000857485.1
GCA_000857565.1
GCA_000857585.1
GCA_000857645.1
GCA_000857665.1
GCA_000857685.1
GCA_000857745.1
GCA_000857865.1
GCA_000857885.1
GCA_000857905.1
GCA_000857925.1
GCA_000857985.1
GCA_000858005.1
GCA_000858045.1
GCA_000858085.1
GCA_000858105.1
GCA_000858145.1
GCA_000858165.1
GCA_000858185.1
GCA_000858225.1
GCA_000858265.1
GCA_000858285.1
GCA_000858325.1
GCA_000858345.1
GCA_000858365.1
GCA_000858425.1
GCA_000858525.1
GCA_000858565.1
GCA_000858665.1
GCA_000858685.1
GCA_000858705.1
GCA_000858765.1
GCA_000858805.1
GCA_000858865.1
GCA_000858905.1
GCA_000858925.1
GCA_000858985.1
GCA_000859185.1
GCA_000859225.1
GCA_000859285.1
GCA_000859585.1
GCA_000859705.1
GCA_000859825.1
GCA_000859885.1
GCA_000859985.2
GCA_000860025.1
GCA_000860125.1
GCA_000860145.1
GCA_000860165.1
GCA_000860185.1
GCA_000860245.1
GCA_000860285.1
GCA_000860405.1
GCA_000860425.1
GCA_000860445.1
GCA_000860485.1
GCA_000860645.1
GCA_000860685.1
GCA_000860705.1
GCA_000860745.1
GCA_000860765.1
GCA_000860805.1
GCA_000860845.1
GCA_000860865.1
GCA_000860905.1
GCA_000860925.1
GCA_000860965.1
GCA_000861025.1
GCA_000861045.1
GCA_000861085.1
GCA_000861105.1
GCA_000861165.1
GCA_000861225.1
GCA_000861405.1
GCA_000861425.1
GCA_000861445.1
GCA_000861465.1
GCA_000861485.1
GCA_000861525.1
GCA_000861545.1
GCA_000861625.1
GCA_000861645.1
GCA_000861725.1
GCA_000861745.1
GCA_000861785.1
GCA_000861805.1
GCA_000861845.1
GCA_000861865.1
GCA_000861885.1
GCA_000861905.1
GCA_000861965.1
GCA_000861985.1
GCA_000862005.1
GCA_000862045.1
GCA_000862065.1
GCA_000862085.1
GCA_000862205.1
GCA_000862245.1
GCA_000862325.1
GCA_000862465.1
GCA_000862585.1
GCA_000862665.1
GCA_000862885.1
GCA_000862925.1
GCA_000863005.1
GCA_000863025.1
GCA_000863045.1
GCA_000863085.1
GCA_000863125.1
GCA_000863145.1
GCA_000863165.1
GCA_000863225.1
GCA_000863265.1
GCA_000863285.1
GCA_000863305.1
GCA_000863325.1
GCA_000863345.1
GCA_000863365.1
GCA_000863385.1
GCA_000863405.1
GCA_000863465.1
GCA_000863505.1
GCA_000863565.1
GCA_000863585.1
GCA_000863665.1
GCA_000863745.1
GCA_000863765.1
GCA_000863885.1
GCA_000863905.1
GCA_000863925.1
GCA_000863945.2
GCA_000863965.1
GCA_000864025.1
GCA_000864085.1
GCA_000864105.1
GCA_000864125.1
GCA_000864205.1
GCA_000864265.1
GCA_000864305.1
GCA_000864325.1
GCA_000864385.1
GCA_000864425.1
GCA_000864505.1
GCA_000864545.1
GCA_000864565.1
GCA_000864685.1
GCA_000864845.1
GCA_000864945.1
GCA_000864965.1
GCA_000864985.2
GCA_000865005.1
GCA_000865065.1
GCA_000865085.1
GCA_000865105.1
GCA_000865225.1
GCA_000865245.1
GCA_000865265.1
GCA_000865325.1
GCA_000865385.1
GCA_000865405.1
GCA_000865425.2
GCA_000865465.1
GCA_000865485.1
GCA_000865585.1
GCA_000865745.1
GCA_000865785.1
GCA_000865805.1
GCA_000865845.1
GCA_000865905.1
GCA_000865925.1
GCA_000865945.1
GCA_000865965.1
GCA_000866025.1
GCA_000866045.1
GCA_000866125.1
GCA_000866145.1
GCA_000866185.1
GCA_000866205.1
GCA_000866245.1
GCA_000866305.1
GCA_000866365.1
GCA_000866385.1
GCA_000866405.1
GCA_000866465.1
GCA_000866545.1
GCA_000866585.1
GCA_000866605.1
GCA_000866665.1
GCA_000866685.1
GCA_000866785.1
GCA_000866825.1
GCA_000866865.1
GCA_000866885.1
GCA_000866905.1
GCA_000866965.1
GCA_000867005.1
GCA_000867045.1
GCA_000867065.1
GCA_000867105.1
GCA_000867125.1
GCA_000867165.1
GCA_000867185.1
GCA_000867285.1
GCA_000867345.1
GCA_000867365.1
GCA_000867405.1
GCA_000867465.1
GCA_000867525.1
GCA_000867565.1
GCA_000867585.1
GCA_000867645.1
GCA_000867665.1
GCA_000867685.1
GCA_000867705.1
GCA_000867725.1
GCA_000867805.1
GCA_000867845.1
GCA_000867985.1
GCA_000868025.1
GCA_000868045.1
GCA_000868065.1
GCA_000868165.1
GCA_000868185.1
GCA_000868225.1
GCA_000868245.1
GCA_000868325.1
GCA_000868445.1
GCA_000868505.1
GCA_000868545.2
GCA_000868585.1
GCA_000868605.1
GCA_000868685.1
GCA_000868805.1
GCA_000868885.1
GCA_000868945.1
GCA_000868985.1
GCA_000869065.1
GCA_000869145.1
GCA_000869205.1
GCA_000869245.1
GCA_000869265.1
GCA_000869285.1
GCA_000869305.1
GCA_000869325.1
GCA_000869345.1
GCA_000869365.1
GCA_000869385.1
GCA_000869405.1
GCA_000869485.1
GCA_000869505.1
GCA_000869525.1
GCA_000869685.1
GCA_000869725.1
GCA_000869825.1
GCA_000869885.1
GCA_000869905.1
GCA_000869925.1
GCA_000869945.1
GCA_000869985.1
GCA_000870025.1
GCA_000870065.1
GCA_000870145.1
GCA_000870185.1
GCA_000870325.1
GCA_000870365.1
GCA_000870385.1
GCA_000870425.1
GCA_000870445.1
GCA_000870465.1
GCA_000870525.1
GCA_000870545.1
GCA_000870645.1
GCA_000870665.1
GCA_000870685.1
GCA_000870745.1
GCA_000870845.1
GCA_000870905.1
GCA_000871025.1
GCA_000871045.1
GCA_000871065.2
GCA_000871105.1
GCA_000871125.1
GCA_000871145.1
GCA_000871305.1
GCA_000871345.1
GCA_000871385.1
GCA_000871405.1
GCA_000871445.1
GCA_000871525.1
GCA_000871565.1
GCA_000871585.1
GCA_000871645.1
GCA_000871685.1
GCA_000871705.1
GCA_000871765.1
GCA_000871885.1
GCA_000871925.1
GCA_000872025.1
GCA_000872085.1
GCA_000872125.1
GCA_000872205.1
GCA_000872245.1
GCA_000872285.1
GCA_000872385.1
GCA_000872405.1
GCA_000872425.2
GCA_000872465.1
GCA_000872485.1
GCA_000872565.1
GCA_000872585.1
GCA_000872605.1
GCA_000872665.1
GCA_000872705.1
GCA_000872785.1
GCA_000872825.1
GCA_000872885.1
GCA_000872905.1
GCA_000873045.1
GCA_000873065.1
GCA_000873085.1
GCA_000873125.1
GCA_000873185.1
GCA_000873305.1
GCA_000873325.1
GCA_000873345.1
GCA_000873465.1
GCA_000873485.1
GCA_000873625.1
GCA_000873665.1
GCA_000873765.1
GCA_000873825.1
GCA_000873845.1
GCA_000873865.1
GCA_000873885.1
GCA_000873925.1
GCA_000874045.1
GCA_000874105.1
GCA_000874225.1
GCA_000874305.1
GCA_000874365.1
GCA_000874385.1
GCA_000874425.1
GCA_000874445.1
GCA_000874465.1
GCA_000874485.1
GCA_000874505.1
GCA_000874525.1
GCA_000874625.1
GCA_000874645.1
GCA_000874665.1
GCA_000874685.1
GCA_000874725.1
GCA_000874765.1
GCA_000874825.1
GCA_000874925.1
GCA_000874945.1
GCA_000875005.1
GCA_000875025.1
GCA_000875065.1
GCA_000875125.1
GCA_000875245.1
GCA_000875325.1
GCA_000875345.1
GCA_000875385.1
GCA_000875445.1
GCA_000875465.1
GCA_000875505.1
GCA_000875545.2
GCA_000875585.1
GCA_000875605.1
GCA_000875775.1
GCA_000876675.2
GCA_000877815.1
GCA_000878995.1
GCA_000879035.1
GCA_000879055.1
GCA_000879075.1
GCA_000879175.1
GCA_000879195.1
GCA_000879255.1
GCA_000879295.1
GCA_000879415.1
GCA_000879435.1
GCA_000879495.1
GCA_000879515.1
GCA_000879535.1
GCA_000879555.1
GCA_000879575.1
GCA_000879635.1
GCA_000879715.1
GCA_000879735.1
GCA_000879755.1
GCA_000879815.1
GCA_000879855.1
GCA_000879935.1
GCA_000879975.1
GCA_000880015.1
GCA_000880075.1
GCA_000880115.1
GCA_000880155.1
GCA_000880175.1
GCA_000880195.1
GCA_000880215.1
GCA_000880235.1
GCA_000880255.1
GCA_000880375.1
GCA_000880475.1
GCA_000880595.1
GCA_000880635.1
GCA_000880655.1
GCA_000880775.1
GCA_000880795.1
GCA_000880835.1
GCA_000880855.1
GCA_000880875.1
GCA_000880895.1
GCA_000880975.1
GCA_000881015.1
GCA_000881035.1
GCA_000881055.1
GCA_000881175.1
GCA_000881195.1
GCA_000881215.1
GCA_000881235.1
GCA_000881255.1
GCA_000881315.1
GCA_000881355.2
GCA_000881395.1
GCA_000881455.1
GCA_000881475.1
GCA_000881495.1
GCA_000881515.1
GCA_000881535.1
GCA_000881555.1
GCA_000881575.1
GCA_000881635.1
GCA_000881695.1
GCA_000881755.1
GCA_000881875.1
GCA_000881895.1
GCA_000881915.1
GCA_000881975.1
GCA_000882035.1
GCA_000882055.1
GCA_000882095.1
GCA_000882195.1
GCA_000882215.1
GCA_000882235.1
GCA_000882315.1
GCA_000882395.1
GCA_000882435.1
GCA_000882455.1
GCA_000882475.1
GCA_000882495.1
GCA_000882555.1
GCA_000882575.1
GCA_000882615.1
GCA_000882635.1
GCA_000882715.1
GCA_000882735.1
GCA_000882755.1
GCA_000882795.1
GCA_000882835.1
GCA_000882955.1
GCA_000882975.1
GCA_000883095.1
GCA_000883135.1
GCA_000883155.1
GCA_000883175.1
GCA_000883215.1
GCA_000883235.1
GCA_000883295.1
GCA_000883315.1
GCA_000883335.1
GCA_000883355.1
GCA_000883375.1
GCA_000883595.1
GCA_000883735.1
GCA_000883775.1
GCA_000883815.1
GCA_000883895.1
GCA_000883915.1
GCA_000883935.1
GCA_000883955.1
GCA_000883975.1
GCA_000883995.1
GCA_000884015.1
GCA_000884055.1
GCA_000884095.1
GCA_000884155.1
GCA_000884195.1
GCA_000884215.1
GCA_000884335.1
GCA_000884355.1
GCA_000884395.1
GCA_000884455.1
GCA_000884515.1
GCA_000884555.1
GCA_000884615.1
GCA_000884635.1
GCA_000884655.1
GCA_000884735.1
GCA_000884755.1
GCA_000884795.1
GCA_000884815.1
GCA_000884875.1
GCA_000884915.1
GCA_000884975.1
GCA_000885075.1
GCA_000885155.1
GCA_000885175.1
GCA_000885235.1
GCA_000885255.1
GCA_000885275.1
GCA_000885295.1
GCA_000885335.1
GCA_000885495.1
GCA_000885555.1
GCA_000885575.1
GCA_000885615.1
GCA_000885635.1
GCA_000885675.1
GCA_000885695.1
GCA_000885715.1
GCA_000885775.1
GCA_000885795.1
GCA_000885815.1
GCA_000885855.1
GCA_000885935.1
GCA_000885995.1
GCA_000886055.1
GCA_000886075.1
GCA_000886115.1
GCA_000886195.1
GCA_000886235.1
GCA_000886295.1
GCA_000886315.1
GCA_000886335.1
GCA_000886375.1
GCA_000886395.1
GCA_000886415.1
GCA_000886455.1
GCA_000886495.1
GCA_000886515.1
GCA_000886575.1
GCA_000886635.1
GCA_000886695.1
GCA_000886815.1
GCA_000886855.1
GCA_000886895.1
GCA_000886915.1
GCA_000886935.1
GCA_000886975.1
GCA_000887075.1
GCA_000887095.1
GCA_000887215.1
GCA_000887255.1
GCA_000887275.1
GCA_000887295.1
GCA_000887335.1
GCA_000887375.1
GCA_000887395.1
GCA_000887415.1
GCA_000887475.1
GCA_000887535.1
GCA_000887575.2
GCA_000887635.1
GCA_000887675.1
GCA_000887775.1
GCA_000887875.1
GCA_000887895.1
GCA_000888015.1
GCA_000888095.1
GCA_000888135.1
GCA_000888195.1
GCA_000888215.1
GCA_000888355.1
GCA_000888395.1
GCA_000888435.1
GCA_000888495.1
GCA_000888535.1
GCA_000888635.1
GCA_000888775.1
GCA_000888875.1
GCA_000888895.1
GCA_000888935.1
GCA_000888955.1
GCA_000888975.1
GCA_000888995.1
GCA_000889015.1
GCA_000889035.1
GCA_000889055.1
GCA_000889115.1
GCA_000889135.1
GCA_000889155.1
GCA_000889195.1
GCA_000889255.1
GCA_000889275.1
GCA_000889295.1
GCA_000889315.1
GCA_000889455.1
GCA_000889475.1
GCA_000889495.1
GCA_000889515.1
GCA_000889555.1
GCA_000889615.1
GCA_000889635.1
GCA_000889675.1
GCA_000889695.1
GCA_000889715.1
GCA_000889775.1
GCA_000889795.1
GCA_000889815.1
GCA_000889835.1
GCA_000889855.1
GCA_000889895.1
GCA_000889915.1
GCA_000889935.1
GCA_000889955.1
GCA_000890015.1
GCA_000890035.1
GCA_000890055.1
GCA_000890135.1
GCA_000890175.1
GCA_000890275.1
GCA_000890295.1
GCA_000890315.1
GCA_000890415.1
GCA_000890515.1
GCA_000890635.1
GCA_000890695.1
GCA_000890735.1
GCA_000890775.1
GCA_000890815.1
GCA_000890855.1
GCA_000890895.1
GCA_000890955.1
GCA_000890975.1
GCA_000891015.1
GCA_000891035.1
GCA_000891155.1
GCA_000891195.1
GCA_000891255.1
GCA_000891275.1
GCA_000891375.1
GCA_000891415.1
GCA_000891435.1
GCA_000891495.1
GCA_000891555.1
GCA_000891715.1
GCA_000891755.1
GCA_000891835.1
GCA_000891855.1
GCA_000891875.2
GCA_000891895.1
GCA_000891935.1
GCA_000891975.1
GCA_000892075.1
GCA_000892175.1
GCA_000892215.1
GCA_000892255.1
GCA_000892395.1
GCA_000892415.1
GCA_000892435.1
GCA_000892455.1
GCA_000892475.1
GCA_000892595.1
GCA_000892655.1
GCA_000892675.1
GCA_000892735.1
GCA_000892755.1
GCA_000892775.1
GCA_000892795.1
GCA_000892875.1
GCA_000892975.1
GCA_000893055.1
GCA_000893095.1
GCA_000893115.1
GCA_000893215.1
GCA_000893275.1
GCA_000893355.1
GCA_000893435.1
GCA_000893475.1
GCA_000893555.1
GCA_000893695.1
GCA_000893835.1
GCA_000893855.1
GCA_000893895.1
GCA_000893935.1
GCA_000893955.1
GCA_000893995.1
GCA_000894015.1
GCA_000894035.1
GCA_000894055.1
GCA_000894075.1
GCA_000894095.1
GCA_000894115.1
GCA_000894215.1
GCA_000894275.1
GCA_000894315.1
GCA_000894335.1
GCA_000894355.2
GCA_000894435.1
GCA_000894475.1
GCA_000894495.1
GCA_000894515.1
GCA_000894535.1
GCA_000894595.1
GCA_000894655.1
GCA_000894695.1
GCA_000894875.2
GCA_000895015.1
[truncated: 43,078 more rows]

## Sheet: Supplementary Table S2
UMLS Keywords and CUIs of interest used in disease2gene DisGeNET query.
Keywords
disease|disorder|cancer|neoplasm|mental|genetic|drug|neurologic|brain|health|cognitive|intelligence|addiction|dementia|disability|hereditary|development|deficiency|condition|itis|infection|ability|microbiome|microbiota|pneumonia|cirrhosis|fibrosis|acquired|resistant|syndrome|degeneration|pathology|pathologic|behavior|psych|dysfunction|abnormal|virus|bacteria|motor|paralysis|defect|human
Disease Class	CUIs
Psychosis/Mental/Cognitive/Nervous System Disorders and Brain Dysfunction	"C0036341", "C0002395", "C0005586", "C3714756", "C0014544", "C0036572", "C1510586", "C0004352", "C0011581", "C0011570", "C0027765", "C0751872", "C0004930", "C0011570"
Substance and Drug Abuse	"C0013146", "C0001973"
Degenerative and Autoimmune Disorders	"C0002736", "C0030567", "C0003873", "C0021053", "C0014130", "C0029456"
Neurodevelopmental Disorder	"C1535926", "C0557874"
Neoplastic Processes	"C0023467", "C0026998", "C0023418", "C0006826"
Lung Diseases	"C0024115"
Eye Disorders	"C0015397", "C0242383"
Metabolic Diseases	"C0011849", "C0020538"
Vascular Diseases	“C0007222”, "C0007820"
Additional Human Specific Diseases	"C0019163", "C0021400", "C0025007", "C0043167", "C0035869", "C0039128", "C0039614", "C0041296", "C0001175", "C0041234", "C0008354","C0019104", "C0011311", "C0041228", "C0024537", "C0024535", "C0024530", "C0024534", "C0023290", "C1301422", "C0026780", "C0032064", "C0035920", "C0037354", "C0041466", "C0041471", "C0043395", "C0035235", "C0035473", "C0001487", "C0010823", "C0155862", "C0032371", "C00…
